# Supplementary material for: Gender Norms and Weight Control Behaviors in U.S. Adolescents: A Prospective Cohort Study (1994–2002)
Source: PubMed Central journal article supplement (PMC6928570; doi:10.1016/j.jadohealth.2019.08.020), 2020-01
Supplement: mmc1.pdf [file mmc1.pdf]

Appendix A. Comparison of characteristics of participants in the National Longitudinal Study of Adolescent to Adult Health at baseline who were included versus excluded<sup>a</sup>

|                                       | Wave I only<br>(n=18,922)  | Wave I-III<br>(n=9,861)    |
|---------------------------------------|----------------------------|----------------------------|
|                                       | Mean (SD) / % <sup>b</sup> | Mean (SD) / % <sup>b</sup> |
| White (non-Hispanic)                  | 59.4%                      | 63.0%                      |
| Black/African American (non-Hispanic) | 24.0%                      | 22.0%                      |
| Hispanic/Latino                       | 18.0%                      | 16.0%                      |
| Asian/Pacific Islander (non-Hispanic) | 8.0%                       | 8.0%                       |
| Age, years                            | 16.6 (1.73)                | 15.8 (1.60)                |
| Socio-economic status                 | -0.03 (1.33)               | 0.06 (1.34)                |

<sup>a</sup> Excluded due to missing one- or seven-year follow-up data, national sample weighting not incorporated into these analyses

<sup>b</sup> SD = standard deviation
